# Supplementary material for: Translation and Psychometric Evaluation of the Professional Bereavement Scale - German Version (PBS-D) among Psycho-oncologists in Germany
Source: Research Square preprint supplement (doi:10.21203/rs.3.rs-8524198/v1), 2026-01-16
Supplement: Supplementary file 1 [file 25018b96cf758a733b7f3d6d.docx]

Table 7, Fit indices

| Model | df | *P*value | CFI | RMSEA | SRMR |
| --- | --- | --- | --- | --- | --- |
| M1 | 428 | <0.001 | 0.812 | 0.080 | 0.087 |
| M2 | 463 | < 0.001 | 0.526 | 0.123 | 0.125 |

Note: M1 = nine-factor-model, four-factor solution (SBR-subscales) and five-factor solution (AGC-subscales) respectively; M2= two-factor model (SBR and AGC total); Abbreviations: CFI, comparative fit index;; df, degrees of freedom; RMSEA, root mean square error of approximation; SRMR, standardized root mean square residual
