# Supplementary material for: Translation and Psychometric Evaluation of the Professional Bereavement Scale - German Version (PBS-D) among Psycho-oncologists in Germany
Source: Research Square preprint supplement (doi:10.21203/rs.3.rs-8524198/v1), 2026-01-16
Supplement: Supplementary file 2 [file 2d502ab09645b292bc16126b.docx]

Table 2, Sample characteristics

| Characteristic | |  |
| --- | --- | --- |
| Gendera, n (%) | |  |
|  | Female | 204 (91.1%) |
|  | Male | 19 (8.5%) |
|  | Non-binary | 1 (0.4%) |
| Age in years, mean (SD) | | 48.33 (12.27) |
| Psycho-oncological care, mean (SD) | |  |
|  | Patients per month | 35.6 (25.79) |
|  | Patient deaths per month | 2.9 (3.65) |
| Professional backgrounda, n (%) | |  |
|  | Psychology | 154 (68.8%) |
|  | Medicine | 18 (8.0%) |
|  | Social work | 12 (5.4%) |
|  | Social education/pedagogy | 18 (8.0%) |
|  | Other | 22 (9.8%) |
| Work settingb, n (%) | |  |
|  | Outpatient psycho-oncological services at a hospital | 49 (19.0%) |
|  | Inpatient psycho-oncological consultation service at a hospital | 100 (38.8%) |
|  | Inpatient psycho-oncological liaison service of at a hospital | 64 (24.8%) |
|  | Cancer counseling center | 53 (20.5%) |
|  | Outpatient psychotherapeutic practice | 40 (15.5%) |
|  | Partial inpatient or inpatient psycho-oncological services at a hospital | 54 (20.9%) |
|  | Partial inpatient or inpatient palliative care | 51 (19.8%) |
|  | Outpatient palliative care | 9 (3.5%) |
|  | Psycho-oncological services in a rehabilitation clinic | 2 (0.8%) |
| Professional experience (in years)a, n (%) | |  |
|  | < 1 | 5 (2.2%) |
|  | 1 to < 5 | 59 (26.3%) |
|  | 5-10 | 51 (22.8%) |
|  | 11-15 | 44 (19.6%) |
|  | 16-20 | 24 (10.7%) |
|  | > 20 | 41 (18.3%) |
| Number of colleaguesc, n (%) | |  |
|  | None | 19 (8.5%) |
|  | 1-5 | 138 (61.9%) |
|  | 6-10 | 30 (13.5%) |
|  | > 10 | 36 (16.1%) |
| Received formal training in psycho-oncologya, n (%) | |  |
|  | Yes | 186 (83.0%) |
|  | No | 38 (17.0%) |

an= 224; bMultiple selection was possible, n= 258c, n=223.
