# Supplementary material for: Translation and Psychometric Evaluation of the Professional Bereavement Scale - German Version (PBS-D) among Psycho-oncologists in Germany
Source: Research Square preprint supplement (doi:10.21203/rs.3.rs-8524198/v1), 2026-01-16
Supplement: Supplementary file 3 [file 31a87e8577a8483dffe12cc6.docx]

Table 4, Inter-Item Correlations for PSB-D-SBR

|  | **Item 1** | **Item 2** | **Item 3** | **Item 4** | **Item 5** | **Item 6** | **Item 7** | **Item 8** | **Item 9** | **Item 10** | **Item 11** | **Item 12** | **Item 13** | **Item 14** | **Item 15** | **Item 16** | **Item 17** |
| --- | --- | --- | --- | --- | --- | --- | --- | --- | --- | --- | --- | --- | --- | --- | --- | --- | --- |
| **Item 1** | 1 | .686** | .171** | .258** | .385** | .293** | .066 | .354** | .078 | .180** | .186** | .214** | .077 | .410** | .303** | .356** | .112 |
| **Item 2** | .686** | 1 | .227** | .282** | .344** | .316** | .104 | .356** | .153* | .193** | .241** | .175** | .067 | .368** | .268** | .362** | .120 |
| **Item 3** | .171** | .227** | 1 | .195** | .234** | .136 | .115 | .315** | .183** | .175** | .249** | .045 | .153* | .227** | .238** | .144** | .356** |
| **Item 4** | .258** | .282** | .195** | 1 | .195** | .694** | -.039 | .317** | .041 | .091 | .120 | .244** | -.091 | .243** | .231** | .160* | .082 |
| **Item 5** | .385** | .344** | .234** | .195** | 1 | .189** | .286** | .282** | .213** | .243** | .176** | .316** | .211** | .860** | .497** | .470** | .286** |
| **Item 6** | .293** | .316** | .136 | .694** | .189** | 1 | 0.37 | .285** | .135 | .110 | .151* | .199** | -.063 | .187** | .138 | .104 | .029 |
| **Item 7** | .066 | .104 | .115 | -.039 | .286** | .037 | 1 | .108 | .601** | .320** | .209** | .193** | .435** | .245** | .319** | .272** | .181** |
| **Item 8** | .354** | .356** | .315** | .317** | .282** | .285** | .108 | 1 | .182** | .270** | .392** | .185** | .152* | .278** | .380** | .196** | .234** |
| **Item 9** | .078 | .153* | .183** | .041 | .213** | .135 | .601** | .182** | 1 | .445** | .328** | .293** | .390** | .197** | .248** | .234** | .254** |
| **Item 10** | .180** | .193** | .175** | .091 | .243** | .110 | .320** | .270** | .445** | 1 | .327** | .444** | .491** | .294** | .351** | .298** | .239** |
| **Item 11** | .186** | .241** | .249** | .120 | .176** | .151* | .209** | .392** | .328** | .327** | 1 | .270** | .154* | .280** | .356** | .284** | .275** |
| **Item 12** | .214** | .175** | .045 | .244** | .316** | .199** | .193** | .185** | .293** | .444** | .270** | 1 | .171** | .384** | .238** | .371** | .245** |
| **Item 13** | .077 | .067 | .153* | -.091 | .211** | -.063 | .435** | .152* | .390** | .491** | .154* | .171** | 1 | .221** | .315** | .116 | .171** |
| **Item 14** | .410** | .368** | .227** | .243** | .860** | .187** | .245** | .278** | .197** | .294** | .280** | .384** | .221** | 1 | .591** | .572** | .301** |
| **Item 15** | .303** | .268** | .238** | .231** | .497** | .138 | .319** | .380** | .248** | .351** | .356** | .238** | .315** | .591** | 1 | .483** | .281** |
| **Item 16** | .356** | .362** | .144* | .160* | .470** | .104 | .272** | .196** | .234** | .298** | .284** | .371** | .116 | .572** | .483** | 1 | .136* |
| **Item 17** | .112 | .120 | .356** | .082 | .286** | .029 | .181** | .234** | .254** | .239** | .275** | .245** | .171** | .301** | .281** | .136* | 1 |

Abbreviations: SBR = Short-term bereavement reactions; AGC = Accumulated global changes

| **. Correlation is significant at the 0.01 level (two-tailed). |
| --- |
| *. Correlation is significant at the 0.05 level (two-tailed). |

Table 5, Inter-Item Correlations for PSB-D-AGC

|  | **Item 1** | **Item 2** | **Item 3** | **Item 4** | **Item 5** | **Item 6** | **Item 7** | **Item 8** | **Item 9** | **Item 10** | **Item 11** | **Item 12** | **Item 13** | **Item 14** | **Item 15** |
| --- | --- | --- | --- | --- | --- | --- | --- | --- | --- | --- | --- | --- | --- | --- | --- |
| **Item 1** | 1 | .784** | .490** | .206** | .174** | .265** | .307** | .447** | .477** | .520** | .194** | .598** | .353** | .395** | .222** |
| **Item 2** | .784** | 1 | .552** | .234** | .231** | .241** | .298** | .503** | .444** | .465** | .145* | .547** | .351** | .351** | .249** |
| **Item 3** | .490** | .552** | 1 | .030 | .072 | .170** | .225** | .789** | .438** | .438** | .049 | .342** | .285** | .365** | .125 |
| **Item 4** | .206** | .234** | .030 | 1 | .390** | .230** | .217** | .025 | .112 | .094 | .268** | .264** | .231** | .056 | .240** |
| **Item 5** | .174** | .231** | .072 | .390** | 1 | .105 | .110 | .142* | .141* | .101 | .125 | .229** | .148* | -.034 | .535** |
| **Item 6** | .265** | .241** | .170** | .230** | .105 | 1 | .840** | .239** | .484** | .441** | .218** | .212** | .172** | .282** | .058 |
| **Item 7** | .307** | .298** | .225** | .217** | .110 | .840** | 1 | .301** | .539** | .498** | .167** | .261** | .223** | .324** | .092 |
| **Item 8** | .447** | .503** | .789** | .025 | .142* | .239** | .301** | 1 | .522** | .521** | .127* | .375** | .295** | .367** | .128* |
| **Item 9** | .477** | .444** | .438** | .112 | .141* | .484** | .539** | .522** | 1 | .866** | .148* | .498** | .399** | .569** | .103 |
| **Item 10** | .520** | .465** | .428** | .094 | .101 | .441** | .498** | .521** | .866** | 1 | .217** | .542** | .398** | .531** | .101 |
| **Item 11** | .194** | .145* | .049 | .268** | .125 | .218** | .167** | .127* | .148* | .217** | 1 | .130* | .129* | .111 | .090 |
| **Item 12** | .598** | .547** | .342** | .264** | .229** | .212** | .261** | .375** | .498** | .542** | .130* | 1 | .566** | .356** | .218** |
| **Item 13** | .353** | .351** | .285** | .231** | .148* | .172** | .223** | .295** | .399** | .398** | .129* | .566** | 1 | .451** | .188** |
| **Item 14** | .395** | .351** | .365** | .056 | -.034 | .282** | .324** | .367** | .569** | .531** | .111 | .356** | .451** | 1 | -.104 |
| **Item 15** | .222** | .249** | .125 | .240** | .535** | .058 | .092 | .128* | .103 | .101 | .090 | .218** | .188** | -.104 | 1 |

Abbreviations: SBR = Short-term bereavement reactions; AGC = Accumulated global changes

| **. Correlation is significant at the 0.01 level (two-tailed). |
| --- |
| *. Correlation is significant at the 0.05 level (two-tailed). |
