# Supplementary material for: Translation and Psychometric Evaluation of the Professional Bereavement Scale - German Version (PBS-D) among Psycho-oncologists in Germany
Source: Research Square preprint supplement (doi:10.21203/rs.3.rs-8524198/v1), 2026-01-16
Supplement: Supplementary file 4 [file 40ef0021cecaaf1be6bea01b.docx]

Table 3, PBS-D Item Analysis

|  | **N** | **M (SD), [Min, Max]** | **Accep-tance**  **(number of**  **missings, n**  **(%))** | **Relevance**  **(number of**  **‘not applica-ble’,**  **n (%))** | **Item**  **difficulty**  **(mean)** | **Cor-**  **rected item-total**  **correla-tion; M1)** | **Item load-ings (M1)** | **Item load-ings (M2)** |
| --- | --- | --- | --- | --- | --- | --- | --- | --- |
| **SBR Scale** |  |  |  |  |  |  |  |  |
| SBR 1: Frustration & Trauma |  |  |  |  |  |  |  |  |
| 5 I felt fatigue | 258 | 1.18 (1.13) [0, 4] | 9 (3.5%) | 11 (4.3%) | .30 | .703 | .891 | .856 |
| 12 I felt nervous and worried about potential professional–patient conflicts | 258 | 0.45 (.83) [0, 4] | 9 (3.5%) | 16 (6.2%) | .11 | .703 | .396 | .432 |
| 13 I doubted the value of my occupation | 258 | 0.16 (.54) | 9 (3.5%) | 9 (3.5%) | .04 | .245 | .272 | .307 |
| 14 I felt exhausted | 258 | 1.06 (1.19) [0, 4] | 9 (3.5%) | 5 (1.9%) | .27 | .813 | .955 | .906 |
| 15 I felt frustrated | 258 | 0.57 (.87) [0, 4] | 9 (3.5%) | 6 (2.3%) | .14 | .608 | .628 | .667 |
| 16 The scene of the event intruded on my mind repeatedly | 258 | 0.56 (.8) [0, 4] | 9 (3.5%) | 5 (1.9%) | .14 | .561 | .599 | .633 |
| 17 I felt anxious for my own death in the future | 258 | 0.65 (.88) [0, 4] | 10 (3.9%) | 6 (2.3%) | .16 | .346 | .336 | .356 |
| SBR 2: Guilt |  |  |  |  |  |  |  |  |
| 7 I blamed myself | 258 | 0.04 (.25) [0, 2] | 9 (3.5%) | 14 (5.4%) | .01 | .423 | .685 | .344 |
| 9 I felt guilty | 258 | 0.08 (.35) [0, 3] | 9 (3.5%) | 8 (3.1%) | .02 | .552 | .817 | .316 |
| 10 I thought that I am not a good healthcare professional. | 258 | 0.28 (.62) [0, 4] | 9 (3.5%) | 11 (4.3%) | .07 | .452 | .551 | .395 |
| 11 I was confused about why the patient died | 258 | 0.46 (.85) [0, 4] | 9 (3.5%) | 16 (6.2%) | .12 | .374 | .423 | .354 |
| SBR 3: Grief |  |  |  |  |  |  |  |  |
| 1 I felt sad | 258 | 1.85 (.93) [0, 4] | 9 (3.5%) | 1 (.4%) | .46 | .520 | .818 | .507 |
| 2 I felt grief | 258 | 1.89 (.96) [0, 4] | 9 (3.5%) | 1 (.4%) | .47 | .540 | .816 | .481 |
| 3 I felt that life is uncertain | 258 | 1.95 (1.29) [0, 4] | 9 (3.5%) | 8 (3.1%) | .49 | .298 | .298 | .324 |
| 8 I felt pity for the death of the patient | 258 | 2.51 (1.2) [0, 4] | 9 (3.5%) | 5 (1.9%) | .63 | .462 | .480 | .417 |
| SBR 4: Being Moved |  |  |  |  |  |  |  |  |
| 4 I was moved by the patient’s family’s understanding | 258 | 2.43 (1.04) [0, 4] | 9 (3.5%) | 61 (23.6%) | .61 | .694 | .809 | .310 |
| 6 I was moved by the patient’s family’s gratitude | 258 | 2.73 (.94) [0, 4] | 9 (3.5%) | 50 (19.4%) | .68 | .694 | .857 | .280 |
| **AGC scale** |  |  |  |  |  |  |  |  |
| AGC 1: New Insights |  |  |  |  |  |  |  |  |
| 1 I am more aware that death is inevitable | 258 | 2.71 (1.39) [0, 4] | 12 (4.7%) | - | .68 | .680 | .844 | .675 |
| 2 I am more aware that life is uncertain | 258 | .278 (1.25) [0, 4] | 12 (4.7%) | - | .70 | .746 | .866 | .648 |
| 3 I cherish my life more | 258 | 2.89 (1.11) [0, 4] | 12 (4.7%) | - | .75 | .698 | .674 | .581 |
| 8 I cherish the present more | 258 | 2.80 (1.06) [0, 4] | 13 (5.0%) | - | .70 | .657 | .651 | .641 |
| AGC 2: More Acceptance of Limitations |  |  |  |  |  |  |  |  |
| 12 I am more aware of the limitation of medical science | 258 | 2.63 (1.46) [0, 4] | 13 (5.0%) | - | .66 | .544 | .783 | .650 |
| 13 The goals in my career have become more practical | 258 | 1.56 (1.36) [0, 4] | 13 (5.0%) | - | .39 | .622 | .652 | .515 |
| 14 I achieve more acceptance of my own death | 258 | 1.70 (1.28) [0, 4] | 13 (5.0%) | - | .43 | .454 | .590 | .607 |
| AGC 3: More Death-Related Anxiety |  |  |  |  |  |  |  |  |
| 4 I feel fatigued by my job | 258 | 1.00 (1.09) [0, 4] | 12 (4.7%) | - | .25 | .428 | .786 | .212 |
| 5 I am more anxious about the future deaths of my loved ones | 258 | 1.27 (1.29) [0, 4] | 12 (4.7%) | - | .32 | .504 | .556 | .202 |
| 11 I deliberately avoid building very close relationships with patients | 258 | 0.80 (1.11) [0, 4] | 14 (5.4%) | - | .20 | .207 | .291 | .227 |
| 15 I am more anxious about my own mortality | 258 | 0.82 (1.03) [0, 4] | 13 (5.0%) | - | .21 | .421 | .392 | .186 |
| AGC 4: Less Influenced by Patient Deaths |  |  |  |  |  |  |  |  |
| 6 The immediate impact that a patient death has on me becomes weaker | 258 | 1.51 (1.25) [0, 4] | 13 (5.0%) | - | .38 | .840 | .878 | .509 |
| 7 The aftereffects of patient deaths become weaker for me | 258 | 1.63 (1.31) | 13 (5.0%) | - | .41 | .840 | .959 | .571 |
| AGC 5: Better Coping with Patient Deaths |  |  |  |  |  |  |  |  |
| 9 I am better at coping with patient deaths | 258 | 2.32 (1.2) [0, 4] | 14 (5.4%) | - | .58 | .866 | .937 | .864 |
| 10 I achieve more acceptance of patient deaths | 258 | 2.30 (1.34) | 14 (5.4%) | - | .58 | .866 | .925 | .866 |

Note: M1 = nine-factor-solution, four-SBR-factors (SBR-subscales) and five-AGC-factors (AGC-subscales); M2= two-factor model (SBR and AGC total); Abbreviations: SBR = Short-term bereavement reactions; AGC = Accumulated global changes
