# Supplementary material for: Translation and Psychometric Evaluation of the Professional Bereavement Scale - German Version (PBS-D) among Psycho-oncologists in Germany
Source: Research Square preprint supplement (doi:10.21203/rs.3.rs-8524198/v1), 2026-01-16
Supplement: Supplementary file 5 [file 45a2198c441b243d0b236265.docx]

**Supplementary file 3, Translation and adaptation documentation**

| **Original** | **Translation RD** | **Translation SW** | **Consented with IS, tested in cognitive interviews** | **Comprehended by X/10 participants** | **Final version** | **Additional information** |
| --- | --- | --- | --- | --- | --- | --- |
| Professional Bereavement Scale |  |  |  |  | Fragebogen zur Erfassung beruflicher Trauer |  |
| **SUBSCALE: Short-term Bereavement Reactions (SBR)** | | | | | | |
| Short-term Bereavement Reactions  Subscale | Subskala: Kurzzeitige Trauerreaktionen | Subskala: Kurzzeitige Trauerreaktionen | Subskala: Kurzfristige Trauerreaktionen | / | Subskala: Kurzfristige Trauerreaktionen (KTR) | / |
| Instruction: Please recall your most recent experience of patient death and rate, from 0-4, on the intensity of your  reactions within a week after that patient  death. | Anweisung: Bitte erinnern Sie sich an  den letzten Tod einer/eines Patient:in und bewerten Sie die Intensität Ihrer  Reaktion innerhalb einer Woche nach  dem Tod der/des Patient:in, auf einer Skala von 0-4. | Anweisung**:** Bitte erinnern Sie sich an Ihre letzte Erfahrung mit dem Tod einer/s Patient:in und bewerten Sie, von 0-4, die Intensität Ihrer Reaktionen innerhalb einer Woche nach dem Tod dieser/dieses Patient:in. | Anweisung: Bitte erinnern Sie sich an Ihre letzte Erfahrung mit dem Tod einer/s Patient:in und bewerten Sie auf einer Skala von 0-4, die Intensität Ihrer Reaktionen innerhalb einer Woche nach dem Tod dieser/dieses Patient:in. | Round 1: 8/8  Round 2: 2/2 | Anweisung: Bitte erinnern Sie sich an Ihre letzte Erfahrung mit dem Tod einer/s Patient:in und bewerten Sie auf einer Skala von 0-4, die Intensität Ihrer Reaktionen innerhalb einer Woche nach dem Tod dieser/dieses Patient:in. | / |
| Scale:  Not at all Weak Medium Strong Extremly strong | Skala: Überhaupt nicht Schwach Mittel Stark Sehr stark | Skala: Gar nicht  Schwach Mittel Stark Sehr stark | Skala: Überhaupt nicht Schwach Mittel Stark Sehr stark | Round 1: 8/8  Round 2: 2/2 | Skala: Überhaupt nicht Schwach Mittel Stark Sehr stark  Nicht zutreffend* (*Bitte nur ankreuzen, wenn wirklich nicht zutreffend (z.B. wenn Familie des/der Patient:in unbekannt ist)) | MR was consulted as an additional reviewer. Response option „not applicable“ (nicht zutreffend) was added to indicate e.g. that a participant can not answer the item due to e.g. not being in contact with a deceased patient’s relatives. |
| 1) I felt sad. | Ich fühlte mich traurig. | Ich fühlte mich traurig | Ich fühlte mich traurig. | Round 1: 8/8 | 1) Ich war traurig. | No clear participants preferences in interview round 1, but "Ich war" was rated as ‚more natural‘ and therefore chosen following team discussion. |
| *ALTERNATIVE PHRASING:*  Ich war traurig. | Round 1: 8/8  Round 2: 2/2 |
| 2) I felt grief. | Ich empfand Trauer. | Ich fühlte Trauer. | Ich empfand Trauer. | Round 1: 8/8  Round 2: 2/2 | 2) Ich empfand Trauer. | / |
| 3) I felt that life is uncertain. | Ich fühlte dass das Leben ungewiss ist. | Ich hatte das Gefühl, dass das Leben  unsicher ist. | Ich hatte das Gefühl, dass das Leben ungewiss ist. | Round 1: 8/8  Round 2: 2/2 | 3) Ich hatte den Eindruck, dass das Leben ungewiss ist. | MR was consulted as an additional reviewer to correctyl translate this item in between interview rounds 1 and 2.  For consistency „uncertain“ will be translated to „ungewiss“ throughout the entire questionnaire.  „Eindruck“ [impression] was chosen following participantc recommendations in interview round 1, due to „uncertain“ [ungewiss) not being an emotion or feeling. |
| *ALTERNATIVE PHRASING:*  Ich hatte den Eindruck, dass das Leben ungewiss ist. | Round 2: 2/2 |
| 4 ) I was moved by the patient’s family’s understanding. | Ich war bewegt vom Verständnis  der Familie der/des Patient:in. | Das Verständnis der Familie der/des  Patient:in hat mich bewegt. | Das Verständnis der Familie der/des  Patient:in hat mich gerührt. | Round 1: 1/8 | 4) Das Verständnis der Familie der/des Patient:in dafür, dass ich mein Bestes gegeben habe und die Medizin ihre Grenzen hat, hat mich gerührt. | Original authors were consulted to receive an explanation of the item’s intended meaning. In line with their recommendations a more specific alternative phrasing of this item was tested in interview round 2. For consistency „being moved by“ will be translated to „von etwas gerührt sein“ throughout the entire questionnaire. |
| *ALTERNATIVE PHRASING:*  Das Verständnis der Familie der/des Patient:in dafür, dass ich mein Bestes gegeben habe und die Medizin ihre Grenzen hat, hat mich gerührt. | Round 2: 2/2 |
| 5) I felt fatigue. | Ich fühlte mich müde. | Ich fühlte mich müde. | Ich fühlte mich müde. | Round 2: 2/2 | 5) Ich fühlte mich müde. | "Ich fühlte mich" was rated as ‚more natural‘ by interview participants, consensus reached via discussion. |
| *ALTERNATIVE PHRASING:*  Ich war müde. | Round 1: 7/8  Round 2: 2/2 |
| 6) I was moved by the patient’s family’s gratitude. | Ich war gerührt von der Dankbarkeit  der Familie der/des Patient:in. | Die Dankbarkeit der Familie der/des  Patient:in hat mich bewegt. | Die Dankbarkeit der Familie der/des  Patient:in hat mich bewegt. | Round 1: 8/8  Round 2: 2/2 | 6) Die Dankbarkeit der Familie der/des  Patient:in hat mich gerührt. | See SBR 4: For consistency „being moved by“ will be translated to „von etwas gerührt sein“ throughout the entire questionnaire, in line with participant preferences. |
| *ALTERNATIVE PHRASING:*  Die Dankbarkeit der Familie der/des Patient:in hat mich gerührt. | Round 1: 8/8  Round 2: 2/2 |
| 7) I blamed myself. | Ich beschuldigte mich selbst. | Ich habe mir selbst die Schuld  gegeben. | Ich gab mir selbst die Schuld. | Round 1: 7/8  Round 2: 2/2  Relevance rating round 1:  5/8 participants perceived the item to be relevant for professional grief assessment. | 7) Ich gab mir selbst die Schuld. | Original authors were consulted to receive an explanation of the item’s intended meaning. |
| 8) I felt pity for the death of the patient. | Ich bedauerte den Tod der/des  Patient:in. | Ich habe Mitleid für den Tod der/des  Patient:in verspürt. | Ich empfand Mitleid für den Tod der/des  Patient:in. | Round 1: 7/8  Round 2: 2/2 | 8) Der Tod des/der Patient:in tat mir leid. | Participants preferred the alternative phrasing, 5/8 participants in interview round 1 found the word „pity“ unfitting in the context of professional bereavement. Following team discussion consensus was reached. |
| *ALTERNATIVE PHRASING:*  Der Tod des/der Patient:in tat mir leid. | Round 2: 2/2 |
| 9) I felt guilty. | Ich fühlte mich schuldig. | Ich habe mich schuldig gefühlt. | Ich fühlte mich schuldig. | Round 1: 8/8  Round 2: 2/2 | 9) Ich fühlte mich schuldig. | To ensure consistency simple past tense was applied throughout the questionnaire if appropriate. |
| 10) I thought that I am not a good doctor/ nurse. | Ich dachte dass ich keine gute Ärztin/ kein guter Arzt / kein gute/e Krankenpfleger:in sei. | Ich dachte, dass ich kein guter Arzt/ keine gute Ärztin/ kein:e gute:r Krankenpfleger:in bin. | Ich dachte, dass ich kein guter Arzt/ keine gute Ärztin/ keine gute Pflegefachperson bin. | / | 10) Ich dachte, dass ich kein:e gute:r Behandler:in bin. | Adaptation necessary to include all healthcare professionals, e.g. psycho-oncologists. |
| *ADAPTED PHRASING:*  Ich dachte, dass ich kein:e gute:r Behandler:in bin. | Round 1: 8/8  Round 2: 2/2 |
| 11) I was confused about why the patient died. | Ich war verwirrt darüber warum der/die Patient:in verstarb. | Ich war verwirrt warum der/die Patient:in gestorben ist. | Ich war verwirrt darüber warum der/die Patient:in verstorben ist. | Round 1: 5/8 | 11) Ich war verwundert darüber, warum die Therapie bei dem/der Patient:in nicht wirkte oder was die genaue Todesursache war. | The original authors were contacted concerning the item’s intended meaning. The alternative phrasing provides more information, in line with the original authors‘ response. |
|  |  |  | *ALTERNATIVE PHRASING:*  Ich war verwundert darüber, warum die Therapie bei dem/der Patient:in nicht wirkte oder was die genaue Todesursache war. | Round 2: 1/2 |
| 12) I felt nervous and worried about  potential professional–patient conflicts. | Ich war nervös und besorgt  über potentiellen Behandler:innen- Patient:innen-Konflikte | Ich war nervös und besorgt auf Grund möglicher Konflikte zwischen Personal und Patient:innen. | Ich war nervös und besorgt über  mögliche Konflikte zwischen Patient:innen und Behandler:innen. | Round 1: 8/8 (following specific explanation, otherwise: 0/8)  Relevance Rating Round 1:  5/8 participants perceived the item to be relevant for professional grief assessment. | 12) Ich war besorgt und nervös hinsichtlich möglicher Konflikte mit den Angehörigen des/der Patient:in. | Original authors were consulted to receive an explanation of the item’s intended meaning and alternative phrasing chosen in accordance with their response and participant preferences (5/8 participants in interview round 1 wihed to include the deceased patient’s relatives). |
| *ALTERNATIVE PHRASING:*  Ich war besorgt und nervös hinsichtlich möglicher Konflikte mit den Angehörigen des/der Patient:in. | Round 2: 2/2 |
| 13) I doubted the value of my  occupation. | Ich zweifelte am Wert meines Berufs. | Ich habe den Sinn meines Berufs  angezweifelt. | Ich zweifelte am Wert meines Berufs. | Round 1: 8/8  Round 2: 2/2 | 13) Ich zweifelte am Sinn meines Berufs. | Participants indicated preferences for translating „value“ with „Sinn“. MR was consulted as an additional reviewer and consensus was reached through discussion. |
| *ALTERNATIVE PHRASING:*  Ich zweifelte am Sinn meines Berufs. | Round 1: 7/8  Round 2: 2/2 |
| 14) I felt exhausted. | Ich fühlte mich erschöpft. | Ich war erschöpft. | Ich fühlte mich erschöpft. | Round 2: 2/2 | 14) Ich fühlte mich erschöpft. | „Ich fühlte mich“ was preferred by participants in round 1, therefore adapted and tested in round 2. |
| *ALTERNATIVE PHRASING:*  Ich war erschöpft. | Round 1: 7/8  Round 2: 2/2 |
| 15) I felt frustrated. | Ich fühlte mich frustriert. | Ich war frustriert. | Ich war frustriert. | Round 1: 8/8  Round 2: 2/2 | 15) Ich war frustriert. | SBR 5: "Ich war" was rated as ‚more natural‘ by interview participants, consensus reached via discussion. |
| 16) The scene of the event intruded on my mind repeatedly. | Die Ereignisse drängten sich wiederholt in meinen Gedanken auf. | Das Bild des Vorfalls drang wiederholt in meine Gedanken ein. | Die Ereignisse drängten sich wiederholt in meinen Gedanken auf. | Round 1: 8/8  Round 2: 2/2  Relevance rating round 1:  8/8 participants rated the item as relevant. | 16) Die Ereignisse drängten sich wiederholt in meinen Gedanken auf. | / |
| 17) I felt anxious for my own death in the future. | Ich hatte Angst vor meinem eigenen Tod in der Zukunft. | Ich hatte Angst vor meinem eigenen,  zukünftigen Tod. | Ich hatte Angst vor meinem eigenen,  zukünftigen Tod. | Round 1: 8/8 | 17) Ich hatte Angst vor meinem eigenen Tod. | 6/8 participants preferred the alternative phrasing in interview round 1, „zukünftig“ was perceived as redundant. |
| *ALTERNATIVE PHRASING:*  Ich hatte Angst vor meinem eigenen Tod. | Round 1: 8/8  Round 2: 2/2 |
| **SUBSCALE: Accumulated Global Changes (AGC)** | | | | | | |
| Accumulated Global Changes Subscale | Subskala: Langzeitveränderungen | Subskala: Langzeitveränderungen | Subskala: Langfristige Veränderungen | / | Subskala: Langfristige Veränderungen (LFV) | / |
| Instruction: Compared with times before  you encountered your first patient death,  you might have been changed after  experiencing all of the patient deaths in  your career. Please rate the extent to  which you have been changed by  patient deaths in each of the following  aspects. There is no right answer, and  please rate according to your true feelings. | Anweisung: Im Vergleich zu der Zeit  bevor Sie den ersten Tod eines Patienten  erlebten, haben Sie sich womöglich aufgrund der zahlreichen erlebten Tode von Patienten im Laufe Ihrer Karriere verändert. Bitte bewerten Sie das Ausmaß dieser Veränderung durch die Tode von Patienten hinsichtlich der folgenden Aspekte. Es gibt keine richtige Antwort und bitte bewerten Sie die Fragen gemäß Ihrer wahren Gefühle. | Anweisung: Im Vergleich zu der Zeit bevor eine:r Ihrer Patient:innen gestorben ist haben Sie sich vielleicht verändert, nachdem Sie sämtliche Todesfälle von Patient:innen im Verlauf Ihrer Karriere erlebt haben. Bitte bewerten Sie das Ausmaß, in dem der Tod von Patient:innen Sie in den folgenden Aspekten verändert hat. Es gibt keine richtigen oder falschen Antworten, bitte kreuzen Sie die Antwort an, die auf Sie persönlich am besten zutrifft. | Im Vergleich zu der Zeit  bevor Sie den ersten Tod eines/einer Patient:in  erlebten, haben Sie sich womöglich aufgrund der bisher im Laufe Ihres Berufslebens erlebten Tode von Patient:innen verändert. Bitte bewerten Sie das Ausmaß, in dem der Tod von Patienten:innen Sie hinsichtlich der folgenden Aspekte verändert hat. Es gibt keine richtigen Antwort; bitte kreuzen Sie die Antwort an, die auf Sie persönlich am besten zutrifft. | Round 1: 8/8  Round 2: 2/2 | Anweisung: Im Vergleich zu der Zeit bevor Sie den ersten Tod eines/einer Patient:in erlebten, haben Sie sich womöglich aufgrund der bisher im Laufe Ihres Berufslebens erlebten Tode von Patient:innen verändert. Bitte bewerten Sie das Ausmaß, in dem der Tod von Patienten:innen Sie hinsichtlich der folgenden Aspekte verändert hat. Es gibt keine richtige Antwort; bitte kreuzen Sie die Antwort an, die auf Sie persönlich am besten zutrifft. | / |
| Scale: No (no such change or the change was not induced by experiencing patient deaths) Yes, few Yes, some Yes, a lot Yes, great deal | Skala: Nein (keine Veränderung oder wenn Veränderung, dann nicht durch den erlebten Tod eines Patienten induziert) Ja, wenige Ja, ein paar Ja, viel Ja, in hohem Maße | Skala:  Nein (keine Veränderungen oder die Veränderung wurde nicht durch den Tod von Patient:innen ausgelöst) Ja, wenige Ja, einige Ja, viele Ja, sehr viele | Skala:  Nein (keine Veränderungen oder die Veränderung wurde nicht durch den Tod von Patient:innen ausgelöst) Ja, ein wenig Ja, etwas Ja, viel Ja, sehr viel | Round 1: 8/8  Round 2: 2/2 | Skala:  Nein* (*keine Veränderungen oder die Veränderung wurde nicht durch den Tod von Patient:innen ausgelöst) Ja, ein wenig Ja, etwas Ja, viel Ja, sehr viel | / |
| 1) I am more aware that death is  inevitable. | Ich bin mir stärker dessen bewusst dass der Tod unausweichlich ist. | Ich bin mir bewusster, dass der Tod  unausweichlich ist. | Mir ist bewusster, dass der Tod unausweichlich ist. | Round 1: 8/8  Round 2: 2/2 | 1) Mir ist bewusster, dass der Tod unausweichlich ist. | / |
| 2) I am more aware that life is  uncertain. | Ich bin mir stärker dessen bewusst dass das Leben unsicher ist. | Ich bin mir bewusster, dass das Leben unsicher ist. | Mir ist bewusster, dass das Leben unsicher ist. | / | 2) Mir ist bewusster, dass das Leben ungewiss ist. | For consistency „uncertain“ was again translated to „ungewiss“. |
| *ALTERNATIVE PHRASING:*  Mir ist bewusster, dass das Leben ungewiss ist. | Round 1: 8/8  Round 2: 2/2 |
| 3) I cherish my life more. | Ich weiß mein Leben mehr zu schätzen. | Ich schätze mein Leben mehr. | Ich weiß mein Leben mehr zu schätzen. | Round 1: 8/8  Round 2: 2/2 | 3) Ich weiß mein Leben mehr zu schätzen. | / |
| 4) I feel fatigued by my job. | Ich fühle mich durch meinen Job müde. | Ich fühle mich von meinem Job  erschöpft. | Ich fühle mich von meiner Arbeit erschöpft. | / | 4) Ich fühle mich von meiner Arbeit ermüdeter. | / |
| *ALTERNATIVE PHRASING:*  Ich fühle mich von meiner Arbeit ermüdeter. | Round 1: 7/8  Round 2: 2/2 |
| 5) I am more anxious about the future  deaths of my loved ones. | Meine Angst vor dem Tod meiner Liebsten in der Zukunft ist größer geworden. | Ich habe mehr Angst vor dem Tod  meiner Angehörigen und Freund:innnen. | Ich habe mehr Angst vor dem Tod  mir nahestehender Menschen. | Round 1: 8/8  Round 2: 2/2 | 5) Ich habe mehr Angst vor dem Tod  mir nahestehender Menschen. | / |
| 6) The immediate impact that a patient  death has on me becomes weaker. | Die unmittelbaren Auswirkungen die  der Tod einer/s Patient:in auf mich hat sind schwächer geworden. | Die direkte Auswirkung, die der Tod  einer/s Patient:in auf mich hat, wird schwächer. | Die unmittelbaren Auswirkungen die  der Tod einer/s Patient:in auf mich hat sind schwächer geworden. | / | 6) Die unmittelbaren Auswirkungen, die der Tod einer/s Patient:in auf mich hat, werden schwächer. | Tense adaption to be as close to the original as possible. For consistency „becomes weaker“ was translated with „wird schwächer“ throughout the entire questionnaire. |
| *ALTERNATIVE PHRASING:*  Die unmittelbaren Auswirkungen, die der Tod einer/s Patient:in auf mich hat, werden schwächer. | Round 1: 7/8  Round 2: 2/2 |
| 7) The after-effects of patient deaths  become weaker for me. | Die Nachwirkungen die der Tod eine/s Patient:in auf mich hat sind schwächer geworden. | Die Nachwirkungen, die der Tod einer:s  Patient:in auf mich hat, wurden für mich schwächer. | Die Nachwirkungen die der Tod eine/s Patient:in auf mich hat sind schwächer geworden. | / | 7) Die Nachwirkungen, die der Tod einer:s Patient:in auf mich hat, werden schwächer. | See AGC 6: For consistency „becomes weaker“ was translated with „wird schwächer“ throughout the entire questionnaire. Additionally, MR was consulted as a third reviewer. |
| *ALTERNATIVE PHRASING:*  Die unmittelbaren Auswirkungen, die der Tod einer/s Patient:in auf mich hat, werden schwächer. | Round 1: 7/8  Round 2: 2/2 |
| 8) I cherish the present more. | Ich schätze die Gegenwart mehr. | Ich schätze die Gegenwart mehr. | Ich schätze die Gegenwart mehr. | Round 1: 8/8  Round 2: 2/2 | 8) Ich schätze die Gegenwart mehr. | / |
| 9) I am better at coping with patient deaths. | Ich kann besser mit dem Tod von  Patient:innen umgehen. | Ich bin besser in der Bewältigung des  Todes von Patient:innen. | Ich kann den Tod von  Patient:innen besser bewältigen. | Round 1: 8/8  Round 2: 2/2 | 9) Ich kann den Tod von Patient:innen besser bewältigen. | / |
| 10) I achieve more acceptance of patient  deaths. | Ich kann den Tod von Patient:innen besser akzeptieren. | Ich akzeptiere den Tod von  Patient:innen mehr. | Ich kann den Tod von Patient:innen besser akzeptieren. | Round 1: 8/8  Round 2: 2/2 | 10) Ich kann den Tod von Patient:innen besser akzeptieren. | / |
| 11) I deliberately avoid building very close relationships with patients. | Ich vermeide es bewusst sehr enge  Beziehungen zu meinen Patient:innen  aufzubauen. | Ich vermeide bewusst enge  Beziehungen zu Patient:innen  aufzubauen. | Ich vermeide es bewusst sehr enge  Beziehungen Patient:innen  aufzubauen. | Round 1: 8/8  Round 2: 2/2 | 11) Ich vermeide es bewusst sehr enge  Beziehungen zu Patient:innen  aufzubauen. | / |
| 12) I am more aware of the limitation of medical science. | Ich bin mir der Grenzen der Medizin stärker bewusst. | Die Grenzen der medizinischen  Forschung sind mir bewusster. | Mir sind die Grenzen der Medizin bewusster. | Round 1: 8/8  Round 2: 2/2  Relevance rating round 1:  6/8 participants rated the item as relevant. | 12) Mir sind die Grenzen der Medizin bewusster. | / |
| 13) The goals in my career have become  more practical. | Die Ziele meines Berufes sind  praxisbezogener geworden. | Meine beruflichen Ziele sind  realistischer geworden. | Meine beruflichen Ziele sind  realistischer geworden. | Round 1: 8/8  Round 2: 2/2 | 13) Meine beruflichen Ziele sind  realistischer geworden. | Original authors were contacted to assess which option conveys the item’s meaning (especially what „practical“ career goals entail). |
| 14) I achieve more acceptance of my own death. | Ich akzeptiere meinen eigenen Tod besser. | Ich akzeptiere meinen eigenen Tod  mehr. | Ich akzeptiere meinen eigenen Tod  mehr. | / | 14) Es gelingt mir besser meinen eigenen Tod  zu akzeptieren. | The alternative phrasing was developed prior to the first round of cognitive interviews, to convey the item’s meaning appropriately. |
| *ALTERNATIVE PHRASING:*  Es gelingt mir besser meinen eigenen Tod zu akzeptieren. | Round 1: 8/8  Round 2: 2/2 |
| 15) I am more anxious about my own  mortality. | Ich bin ängstlicher bezüglich meiner  eigenen Sterblichkeit. | Ich habe mehr Angst vor meiner  eigenen Sterblichkeit. | Ich habe mehr Angst vor meiner  eigenen Sterblichkeit. | Round 1: 8/8  Round 2: 2/2  Relevance rating round 1:  8/8 participants rated the item as relevant. | 15) Ich habe mehr Angst vor meiner  eigenen Sterblichkeit. | / |

Note: Comprehensibility was rated by RD based on participant responses to probing questions using a three-point scale (1 = clearly understood, 2 = unclear/uncertain, 3 = clearly misunderstood). Only items rated as 1 were counted as „comprehended“ in this table.
