# Supplementary material for: Translation and Psychometric Evaluation of the Professional Bereavement Scale - German Version (PBS-D) among Psycho-oncologists in Germany
Source: Research Square preprint supplement (doi:10.21203/rs.3.rs-8524198/v1), 2026-01-16
Supplement: Supplementary file 6 [file 5c2f3e8b50c736bf9c55eba5.docx]

Table 1, Statistical analysis and criteria

| **Statistical analysis** | **Criteria/Description** |
| --- | --- |
| Item Response  Distributions | Evaluates the item-level descriptive statistics such as mean (M), standard deviation (SD), minimum and maximum. |
| Inter-Item  Correlations23,24 | Assesses the degree of relationship between pairs of items. Inter-item correlations were calculated to assess redundancy (> .8) or lack of coherence (< .2). |
| Corrected Item-Total  Correlations25 | Measures the relationship between each item and the total score excluding the item. Higher values indicate good item consistency. Generally, values > 0.3 are considered acceptable, representing items measuring the same underlying concepts. Items with < 0.30 should be considered to be removed. |
| Item Difficulties26 | Quantifies how much the full range oft he response scale is endorsed. Ranges from 0 (floor effect) to 1 (ceiling effect). Item difficulties are calculated by dividing item means by the maximal value of the answer range (0–4). Item difficulties were computed as percentages of maximum scores, with values between .2 and .8 deemed optimal.26 |
| Cronbach’s α27 | Assesses internal consistency of the sub-scales, indicating the degree to which the items reliably measure the same underlying construct; values ≥ 0.70 are considered acceptable for early stages of research, with ≥ 0.80 preferred for established scales. |
| McDonalds ω20,21 | Provides an estimate of scale reliability, with Cronbach’s α representing a Guttman lower bound under most conditions, while McDonald’s ω typically offers a more accurate reliability estimate; it is recommended to report both coefficients, as α remains widely used. |
| Correlations with other measures9 | Assesses construct validity (in partcular convergent validity) by formulating and testing hypotheses about correlations with other measures |
| Goodness-of-fit indices9 | Structural validity was examined with confirmatory factor analysis (CFA).  Estimators for good model fit:  Root-mean-square error of approximation (RMSEA) <.1  Comparative fit index (CFI) >.9  Standardized Root Mean Square Residual (SRMR) <.1 |
| Item loading9 | Assesses structural validity using Confirmatory Factor Analysis (CFA), with an item loading cut-off of 0.20; loadings falling below this threshold indicate limited item performance, as CFA evaluates whether the hypothesized factor structure is supported by the data and thus provides evidence for construct validity. |
