# Supplementary material for: Translation and Psychometric Evaluation of the Professional Bereavement Scale - German Version (PBS-D) among Psycho-oncologists in Germany
Source: Research Square preprint supplement (doi:10.21203/rs.3.rs-8524198/v1), 2026-01-16
Supplement: Supplementary file 7 [file 879ff1f31a3d87f9a4530a60.docx]

**Supplementary file 6, Professional associations within the recruitment process**

**List of professional associations, who forwarded the study invitation to their members:**

- Psycho-Oncology Working Group of the German Cancer Aid’s Network of Comprehensive Cancer Centers (*Arbeitsgruppe Psychoonkologie des Netzwerks Onkologische Spitzenzentren – CCC*)
- State Consortium for Cancer Counselling Services (*Bundesarbeitsgemeinschaft für Krebsberatungsstellen e.V*.)
- Association for Continued Education in Psycho-Social Oncology (*Weiterbildung Psychosoziale Onkologie e.V.*)
- Psychosocial Working Group within the Society for Pediatric Oncology and Hematology (*Psychosoziale Arbeitsgemeinschaft in der Pädiatrischen Onkologie und Hämatologie - AG in der Gesellschaft für Pädiatrische Onkologie und Hämatologie e.V.*)
- German Cancer Association’s Consortium for Psycho-Oncology (*Arbeitsgemeinschaft Psychosoziale Onkologie der Deutschen Krebsgesellschaft*).
- Addition: members of a regional network of psycho-oncologists in the Hamburg metropolitan area (*Psychoonkologie Treffen – POT*)
