# Supplementary material for: Translation and Psychometric Evaluation of the Professional Bereavement Scale - German Version (PBS-D) among Psycho-oncologists in Germany
Source: Research Square preprint supplement (doi:10.21203/rs.3.rs-8524198/v1), 2026-01-16
Supplement: Supplementary file 8 [file 8800af1da0b93494930015c2.docx]

Table 6, Internal consistency

| **Scale** | | **Number of items** | **Cronbach’s α** | **MacDonald‘s Omega** |
| --- | --- | --- | --- | --- |
| SBR | | 17 | .856 | .830 |
|  | SBR1 (Frustration & Trauma) | 7 | .798 | .798 |
|  | SBR2 (Guilt) | 4 | .567 | .720 |
|  | SBR3 (Grief) | 4 | .658 | .713 |
|  | SBR4 (Being Moved) | 2 | .817 | .819 |
| AGC | | 15 | .868 | .863 |
|  | AGC1 (New Insights) | 4 | .850 | .848 |
|  | AGC2 (More Acceptance of Limitations) | 3 | .717 | .717 |
|  | AGC3 (More Death-Related Anxiety) | 4 | .604 | .591 |
|  | AGC4 (Less Influenced by Patient Deaths) | 2 | .913 | .916 |
|  | AGC5 (Better Coping with Patient Deaths) | 2 | .925 | .928 |

Note: SBR = Short-term bereavement reactions; AGC = Accumulated global changes
