# Supplementary material for: Translation and Psychometric Evaluation of the Professional Bereavement Scale - German Version (PBS-D) among Psycho-oncologists in Germany
Source: Research Square preprint supplement (doi:10.21203/rs.3.rs-8524198/v1), 2026-01-16
Supplement: Supplementary file 9 [file 98cff9ca186f88903775b40a.docx]

Table 8, Measures of the PBS-D’s convergent validity

|  |  | TRIG (present feelings) | ProQOL BO | ProQOL STS | ProQOL CS |
| --- | --- | --- | --- | --- | --- |
| SBR |  | .594** | .385** | - | - |
|  | SBR1 | .503** | .511** | - | - |
|  | SBR2 | .379** | .364** | - | - |
|  | SBR3 | .510** | .162** | - | - |
|  | SBR4 | .270** | -.024 (.367) | - | - |
| AGC |  | - | .098 (.065) | .081 (.105) | -.012 (.428) |
|  | AGC1 | - | -.072 (.133) | -.046 (.240) | .072 (.130) |
|  | AGC2 | - | .030 (.323) | .005 (.468) | -.021 (.375) |
|  | AGC3 | - | .446** | .441** | -.205** |
|  | AGC4 | - | .061 (.171) | .011 (.436) | .001 (.495) |
|  | AGC5 | - | -.102 (.058) | -.132* | .112* |

| **. Correlation is significant at the 0.01 level (two-tailed). |
| --- |
| *. Correlation is significant at the 0.05 level (two-tailed). |

Abbreviations: SBR = Short-term bereavement reactions; AGC = Accumulated global changes; TRIG = Texas Revised Inventory of Grief; ProQOL = ; ProQOL BO = Professional Quality of Life Scale - Burnout Subscale; ProQOL STS = Professional Quality of Life Scale - Secondary Traumatic Stress Subscale; ProQOL CS = Professional Quality of Life Scale - Compassion Satisfaction Subscale
