# Supplementary material for: Translation and Psychometric Evaluation of the Professional Bereavement Scale - German Version (PBS-D) among Psycho-oncologists in Germany
Source: Research Square preprint supplement (doi:10.21203/rs.3.rs-8524198/v1), 2026-01-16
Supplement: Supplementary file 10 [file c1a9558ca9cf157e4e225183.docx]

**Supplementary file 4, Detailed Content Validity Assessment Methodology**

**Data Collection and Analysis**

All cognitive interviews were audio-recorded, transcribed verbatim, and analyzed qualitatively. Probing techniques assessed participants' understanding (e.g., through paraphrasing), perceived relevance, and completeness of the items.

**Comprehensibility Assessment**

Comprehensibility was assessed for all items individually using the following probing techniques:

- Direct questions: "Is this statement easy for you to understand?" ("Ist diese Aussage für Sie gut verständlich?")
- Paraphrasing requests: Participants were asked to rephrase an item's meaning in their own words, e.g.:"Please rephrase this sentence, in your own words." ("Bitte formulieren Sie diesen Satz in eigenen Worten neu.")
- Key word definitions: Participants were asked to define an item's key words, e.g., "What is meant by 'uncertain'?" pertaining to SBR item 3 "I felt that life is uncertain."

Comprehensibility was rated by the research team (RD, IS, SW, MR) based on participants' responses to probing questions for all items, following the methodological approach of Christalle et al. (2018), using a three-point scale:

- 1 = good (participants clearly understood the item)
- 2 = unclear (uncertain whether a participant understood the item)
- 3 = insufficient (participant clearly misunderstood the item)

**Relevance Assessment**

Relevance was assessed using both global and item-specific approaches:

*Global assessment:* One probing question was posed at the end of each interview: "In your opinion, are all items you answered relevant for assessing professional grief?" ("Sind alle Items, die Sie beantwortet haben, Ihrer Meinung nach zur Erfassung beruflicher Trauer relevant?")

*Individual item assessment:* For four specific items, SBR items 7 ("I felt that life is uncertain") and 16 ("I felt nervous and worried about potential professional-patient conflicts") and AGC items 12 ("I am more anxious about my own mortality") and 15 ("I am more aware of the limitations of medical science"), relevance was additionally assessed individually. These items were flagged during the translation process as potentially less relevant, warranting targeted evaluation.

**Completeness Assessment**

Completeness was assessed using one global probing question: "Can you think of any other questions or topics that could be addressed in the context of 'professional grief'? In your opinion, is the construct of 'professional grief' fully represented?" ("Fallen Ihnen noch weitere Fragen oder Themen ein, welche man im Kontext der 'beruflichen Trauer' hätte thematisieren können? Ist das Konstrukt 'berufliche Trauer' Ihrer Meinung nach vollständig abgebildet?")

**Analysis of Relevance and Completeness Data**

Responses to the global questions on the scale's relevance and completeness were transcribed and analyzed using qualitative content analysis. Due to the concise nature of participant responses and the absence of a standardized analytical framework for cognitive interview data, a flexible and open approach was chosen. No predefined categories or coding systems were required.
