# Supplementary material for: Translation and Psychometric Evaluation of the Professional Bereavement Scale - German Version (PBS-D) among Psycho-oncologists in Germany
Source: Research Square preprint supplement (doi:10.21203/rs.3.rs-8524198/v1), 2026-01-16
Supplement: Supplementary file 11 [file d6975fafcf613ffa26a47237.docx]

**Supplementary File 5, PBS-D**

| Fragebogen zur beruflichen Trauer |  |  |
| --- | --- | --- |

**Subskala: Kurzfristige Trauerreaktionen (KTR)**

**Anweisung:** Bitte erinnern Sie sich an Ihre letzte Erfahrung mit dem Tod einer/s Patient:in und bewerten Sie auf einer Skala von 0-4, die Intensität Ihrer Reaktionen innerhalb einer Woche nach dem Tod dieser/dieses Patient:in.

|  | **Überhaupt nicht** | **Schwach** | **Mittel** | **Stark** | **Sehr stark** | **Nicht zutreffend*** |  |
| --- | --- | --- | --- | --- | --- | --- | --- |
| Ich war traurig. | 🞎 | 🞎 | 🞎 | 🞎 | 🞎 | 🞎 |
| Ich empfand Trauer. | 🞎 | 🞎 | 🞎 | 🞎 | 🞎 | 🞎 |
| Ich hatte den Eindruck, dass das Leben ungewiss ist. | 🞎 | 🞎 | 🞎 | 🞎 | 🞎 | 🞎 |
| Das Verständnis der Familie des/der Patient:in dafür, dass ich mein Bestes gegeben habe und die Medizin ihre Grenzen hat, hat mich gerührt. | 🞎 | 🞎 | 🞎 | 🞎 | 🞎 | 🞎 |
| Ich fühlte mich müde. | 🞎 | 🞎 | 🞎 | 🞎 | 🞎 | 🞎 |
| Die Dankbarkeit der Familie der/des Patient:in hat mich gerührt. | 🞎 | 🞎 | 🞎 | 🞎 | 🞎 | 🞎 |
| Ich gab mir selbst die Schuld. | 🞎 | 🞎 | 🞎 | 🞎 | 🞎 | 🞎 |
| Der Tod des/der Patient:in tat mir leid. | 🞎 | 🞎 | 🞎 | 🞎 | 🞎 | 🞎 |
| Ich fühlte mich schuldig. | 🞎 | 🞎 | 🞎 | 🞎 | 🞎 | 🞎 |
| Ich dachte, dass ich kein/e gute/r Behandler:in bin. | 🞎 | 🞎 | 🞎 | 🞎 | 🞎 | 🞎 |
| Ich war verwundert darüber, warum die Therapie bei dem/der Patient:in nicht wirkte oder was die genaue Todesursache war. | 🞎 | 🞎 | 🞎 | 🞎 | 🞎 | 🞎 |
| Ich war besorgt und nervös hinsichtlich möglicher Konflikte mit den Angehörigen des/der Patient:in. | 🞎 | 🞎 | 🞎 | 🞎 | 🞎 | 🞎 |
| Ich zweifelte am Sinn meines Berufs. | 🞎 | 🞎 | 🞎 | 🞎 | 🞎 | 🞎 |
| Ich fühlte mich erschöpft. | 🞎 | 🞎 | 🞎 | 🞎 | 🞎 | 🞎 |
| Ich war frustriert. | 🞎 | 🞎 | 🞎 | 🞎 | 🞎 | 🞎 |
| Die Ereignisse drängten sich wiederholt in meinen Gedanken auf. | 🞎 | 🞎 | 🞎 | 🞎 | 🞎 | 🞎 |
| Ich hatte Angst vor meinem eigenen Tod. | 🞎 | 🞎 | 🞎 | 🞎 | 🞎 | 🞎 |

** Bitte nur ankreuzen, wenn wirklich nicht zutreffend (z.B. wenn Familie des/der Patient:in unbekannt ist)*

**Subskala: Langfristige Veränderungen (LFV)**

**Anweisung:** Im Vergleich zu der Zeit bevor Sie den ersten Tod eines/einer Patient:in erlebten, haben Sie sich womöglich aufgrund der bisher im Laufe Ihres Berufslebens erlebten Tode von Patient:innen verändert. Bitte bewerten Sie das Ausmaß, in dem der Tod von Patienten:innen Sie hinsichtlich der folgenden Aspekte verändert hat. Es gibt keine richtige Antwort; bitte kreuzen Sie die Antwort an, die auf Sie persönlich am besten zutrifft.

|  | **Nein*** | **Ein wenig** | **Etwas** | **Viel** | **Sehr viel** |
| --- | --- | --- | --- | --- | --- |
| Mir ist bewusster, dass der Tod unausweichlich ist. | 🞎 | 🞎 | 🞎 | 🞎 | 🞎 |
| Mir ist bewusster, dass das Leben ungewiss ist. | 🞎 | 🞎 | 🞎 | 🞎 | 🞎 |
| Ich weiß mein Leben mehr zu schätzen. | 🞎 | 🞎 | 🞎 | 🞎 | 🞎 |
| Ich fühle mich von meiner Arbeit ermüdeter. | 🞎 | 🞎 | 🞎 | 🞎 | 🞎 |
| Ich habe mehr Angst vor dem Tod mir nahestehender Menschen. | 🞎 | 🞎 | 🞎 | 🞎 | 🞎 |
| Die unmittelbaren Auswirkungen, die der Tod einer/s Patient:in auf mich hat, werden schwächer. | 🞎 | 🞎 | 🞎 | 🞎 | 🞎 |
| Die Nachwirkungen, die der Tod einer:s Patient:in auf mich hat, werden schwächer. | 🞎 | 🞎 | 🞎 | 🞎 | 🞎 |
| Ich schätze die Gegenwart mehr. | 🞎 | 🞎 | 🞎 | 🞎 | 🞎 |
| Ich kann den Tod von Patient:innen besser bewältigen. | 🞎 | 🞎 | 🞎 | 🞎 | 🞎 |
| Ich kann den Tod von Patient:innen besser akzeptieren. | 🞎 | 🞎 | 🞎 | 🞎 | 🞎 |
| Ich vermeide es bewusst, sehr enge Beziehungen zu Patient:innen aufzubauen. | 🞎 | 🞎 | 🞎 | 🞎 | 🞎 |
| Mir sind die Grenzen der Medizin bewusster. | 🞎 | 🞎 | 🞎 | 🞎 | 🞎 |
| Meine beruflichen Ziele sind realistischer geworden. | 🞎 | 🞎 | 🞎 | 🞎 | 🞎 |
| Es gelingt mir besser, meinen eigenen Tod zu akzeptieren. | 🞎 | 🞎 | 🞎 | 🞎 | 🞎 |
| Ich habe mehr Angst vor meiner eigenen Sterblichkeit. | 🞎 | 🞎 | 🞎 | 🞎 | 🞎 |

* *keine Veränderungen oder die Veränderung wurde nicht durch den Tod von Patient:innen ausgelöst*.
