# Supplementary material for: Translation and Psychometric Evaluation of the Professional Bereavement Scale - German Version (PBS-D) among Psycho-oncologists in Germany
Source: Research Square preprint supplement (doi:10.21203/rs.3.rs-8524198/v1), 2026-01-16
Supplement: Supplementary file 12 [file ef762a0f86b5bffe3fefa97f.docx]

**Supplementary file 2, TRAPD process**

Professional Bereavement Scale (PBS) (English)

Translation 1 (RD)

Consultation with PBS authors

- Item 7 (SBR)

Team discussion and adaptation of items (RD, SW, IS, MR)

Discussion within the research team

- Item 4 & 11 (SBR)

Translation 2 (SW)

Review (RD, SW, IS)

Professional Bereavement Scale – German Version (PBS-D)

Team discussion and adaptation of items (RD, SW, IS, MR)

Cognitive interviews – round 1 (n = 8)

Cognitive interviews – round 2 (n = 2)

Consultation with PBS authors regarding

- Item 4, 11 & 12 (SBR)
- Item 13 (AGC)

Adjudication

Documentation
